# Supplementary material for: Preclinical pharmacodynamic evaluation of drug candidate SKLB-178 in the treatment of non-small cell lung cancer
Source: PubMed Central journal article supplement (PMC5355060; doi:10.18632/oncotarget.14597), 2017-01-11
Supplement: oncotarget-08-12843-s001.pdf [file oncotarget-08-12843-s001.pdf]

## Preclinical pharmacodynamic evaluation of drug candidate SKLB-178 in the treatment of non-small cell lung cancer

### Supplementary Materials

#### SUPPLEMENTARY METHODS

##### Synthesis of SKLB-178

Commercially available 4-fluoronitrobenzene(1) reacted with 1-methylpiperazine in the presence of  $K_2CO_3$  in DMSO to produce the intermediate 2. The catalytic hydrogenation of the nitro functionality in 2 with palladium on carbon (Pd/C) provided the desired aniline 3 in excellent yield. Reaction of the commercially available 2,4-dichloro-5-nitro-pyrimidine (4) with cyclopentylamine produced the intermediate 5. Nucleophilic aromatic substitution of the 2-chloro position

in 5 with 3 in n-butanol at 90°C yielded the compound 6. Subsequent hydrogenation of the nitro group in 6 using Pd/C as a catalyst provided a good yield of the desired intermediate 7, which was treated with 1-bromo-4-isothiocyanatobenzeno to produce the compound SKLB-178. Yield: (48%, 95% HPLCpurity).  $^1H$ NMR (400 MHz,  $DMSO-d_6$ ):  $\delta$  9.22 (s, 1H), 9.09 (s, 1H), 8.39 (s, 1H), 7.83 (d,  $J = 9.2$  Hz, 2H), 7.66 (d,  $J = 8.0$  Hz, 2H), 7.51 (d,  $J = 8.0$  Hz, 2H), 6.93 (d,  $J = 8.0$  Hz, 2H), 4.98-4.94 (m, 1H), 3.15 (m, 4H), 2.75 (m, 4H), 2.46 (s, 3H), 2.05 (m, 4H), 1.68 (m, 2H), 1.23(m, 2H); MS (ESI, positive ion) m/z: 547.1 [M + H]<sup>+</sup>.

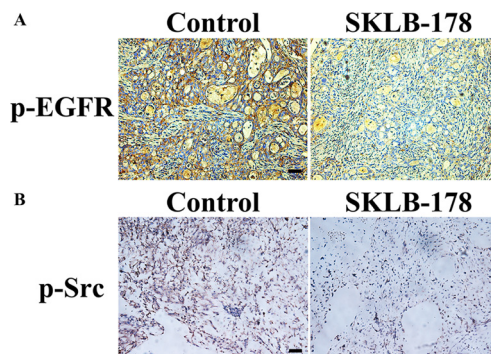

**Supplementary Figure S1: SKLB-178 potently inhibited the activities of EGFR and Src *in vivo*.** (A) Inhibition of EGFR phosphorylation by SKLB-178 was detected in HCC827 xenograft model. Paraffin sections of tumor tissues from vehicle and 10 mg/kg SKLB-178 treatment groups were used for staining. Scale bar, 100  $\mu$ m. (B) Suppression of Src phosphorylation by SKLB-178 was determined in A549 model. Paraffin sections of tumor tissues from vehicle and 150 mg/kg SKLB-178 treatment groups were used for analysis. Scale bar, 100  $\mu$ m.

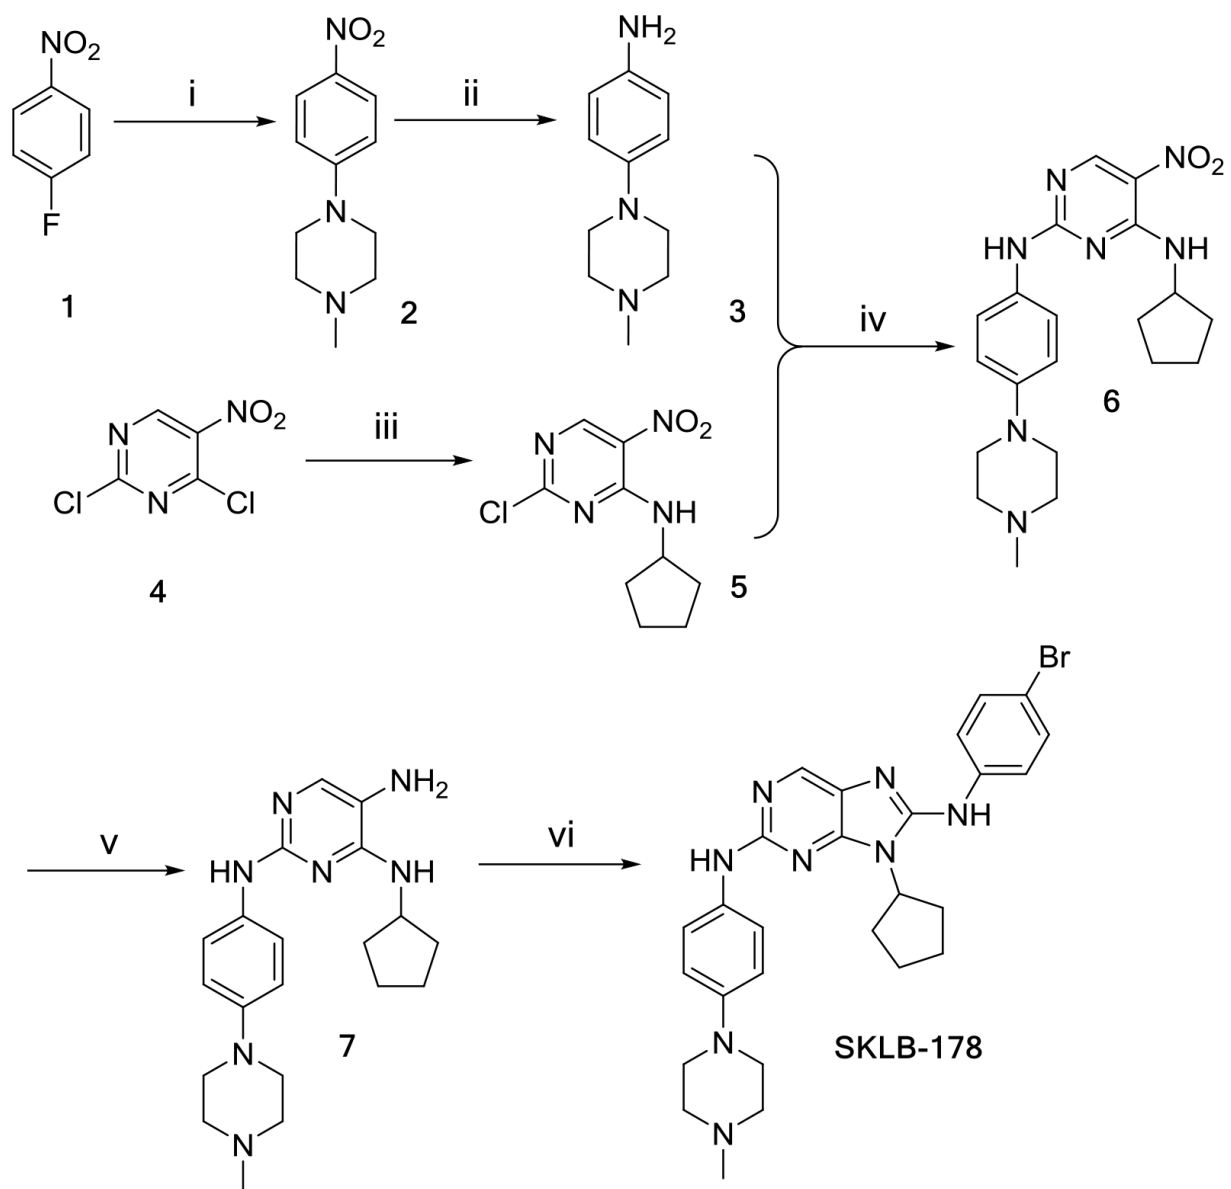

**Supplementary Scheme S1: Synthesis of the compound SKLB-178. Reagents and conditions.** (i) 1-methylpiperazine,  $\text{K}_2\text{CO}_3$ , DMSO, rt, 6 h, 95%; (ii)  $\text{H}_2$ , 10% Pd/C, EtOH, rt, 9 h, 90%; (iii)  $\text{CH}_2\text{Cl}_2$ , DIEA, amine,  $-60^\circ\text{C}$  to room temperature, 60%; (iv) n-butanol,  $90^\circ\text{C}$ , 5 h, 76%; (v)  $\text{H}_2$ , 10% Pd/C, MeOH,  $50^\circ\text{C}$ , 6 h, 85%; (vi)  $\text{CH}_2\text{Cl}_2$ , DIEA, EDIC, 1-bromo-4-isothiocyanatobenzene, reflux, 12 h, 48%.

**Supplementary Table S1: *In vitro* kinase inhibition profile of SKLB-178**

| <b>Kinases</b>           | <b>Inhibition rate @ 1 <math>\mu</math>M</b> | <b>Inhibition rate @ 10 <math>\mu</math>M</b> |
|--------------------------|----------------------------------------------|-----------------------------------------------|
| EGFR (h)                 | 101                                          | 102                                           |
| EGFR(L858R)(h)           | 100                                          | 100                                           |
| EGFR(T790M)(L858R)(h)    | 99                                           | 103                                           |
| ErbB4 (h)                | 100                                          | —                                             |
| FAK(h)                   | 7                                            | 10                                            |
| FGFR1(h)                 | 0                                            | 0                                             |
| IGF-1R (h)               | 11                                           | —                                             |
| KDR(h)                   | 103                                          | 100                                           |
| MEK(h)                   | 0                                            | 1                                             |
| MET (h)                  | 0                                            | 88                                            |
| MKK4(m)                  | —                                            | 0                                             |
| mTOR (h)                 | —                                            | 0                                             |
| PDGFR $\alpha$ (h)       | 58                                           | —                                             |
| PDGFR $\beta$ (h)        | 26                                           | 27                                            |
| PI3 Kinase (p110/p85)(h) | 6                                            | 2                                             |
| PLK1 (h)                 | —                                            | 0                                             |
| Src(1-530)(h)            | 100                                          | 101                                           |
| Syk (h)                  | 28                                           | —                                             |
